# Supplementary material for: Study on Low Thermal-Conductivity of PVDF@SiAG/PET Membranes for Direct Contact Membrane Distillation Application
Source: MDPI journal article supplement (doi:10.3390/membranes13090773), 2023-08-31
Supplement: s1 [file s1]

# **Supporting Information**

## **Study on low thermal-conductivity of PVDF@SiAG/PET membranes for direct contact membrane distillation application**

Jun Xiang <sup>1,2</sup>, Sitong Wang <sup>1</sup>, Nailin Chen <sup>1</sup>, Xintao Wen <sup>1</sup>, Guiying Tian <sup>1,2</sup>, Lei Zhang <sup>1,2</sup>, Penggao Cheng <sup>1,2</sup>, Jianping Zhang <sup>1,2</sup> and Na Tang <sup>1,2,\*</sup>

<sup>1</sup>Tianjin Key Laboratory of Brine Chemical Engineering and Resource Eco-utilization, College of Chemical Engineering and Material Science, Tianjin University of Science and Technology (TUST), 13<sup>th</sup> Avenue 29, TEDA, Tianjin 300457, China

<sup>2</sup>State Key Laboratory of Biobased Fiber Manufacturing Technology, Tianjin University of Science and Technology, 13<sup>th</sup> Avenue 29, TEDA, 300457 Tianjin, China

\*Corresponding author. E-mail address: [tjtangna@tust.edu.cn](mailto:tjtangna@tust.edu.cn) (Na Tang)

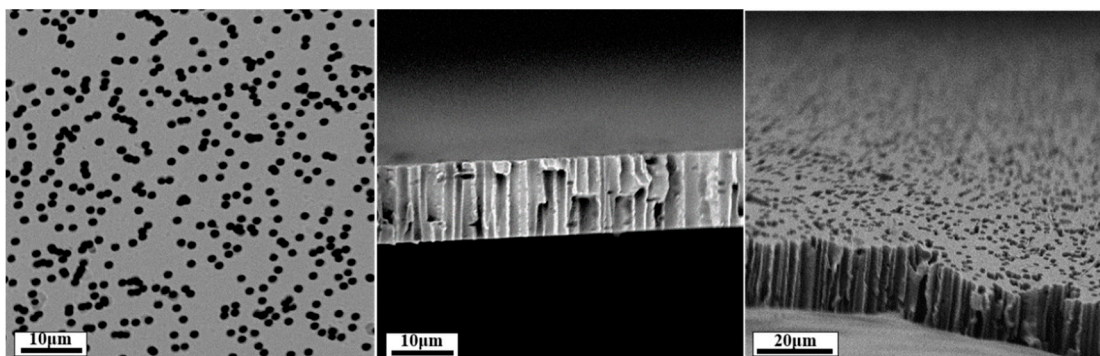

Fig. S1 SEM images of PET nuclear-track membranes.

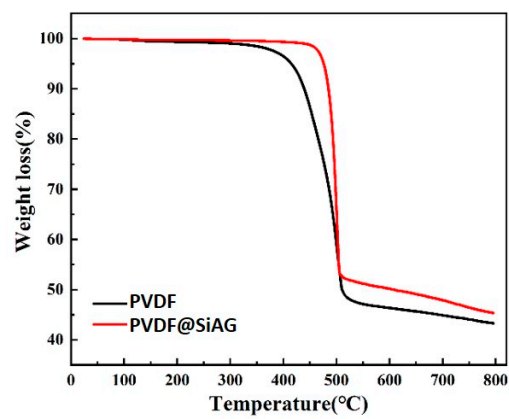

Fig. S2 Thermal gravimetric diagram of the bare PVDF and the PVDF@SiAG.

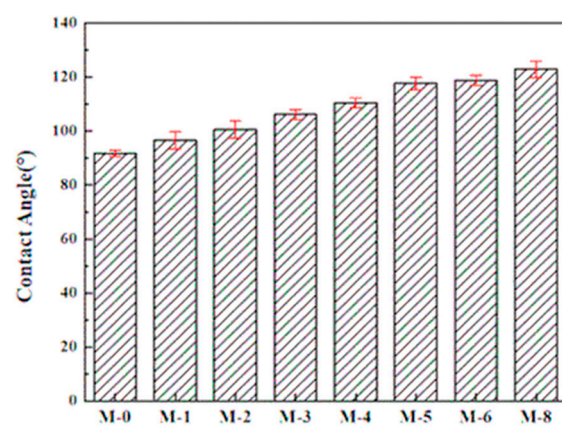

Fig. S3 Dependence of the apparent contact angle on the PVDF@SiAG/PET membranes.
